# Supplementary material for: Workplace Assessment Scale: Pilot Validation Study
Source: Preprints.org preprint supplement (doi:10.20944/preprints202208.0391.v1), 2022-08-23
Supplement: Supplementary file 3 [file supplementary]

Archive with 3 entries (3 files):
- File S1 - Case Vignettes.docx
- File S2 - Workplace Assessment Scale.docx
- Table S1. Study outcome measures and timing of administration.docx
