# Supplementary material for: Workplace Assessment Scale: Pilot Validation Study
Source: Preprints.org preprint supplement (doi:10.20944/preprints202208.0391.v1), 2022-08-23
Supplement: Supplementary file 3 [file supplementary › File S2 - Workplace Assessment Scale.docx]

**File S2. The Workplace Assessment Scale with forward scoring and administration instructions**

Tick the box next to the answer that best describes how you have been feeling about your workplace in the past week. Don’t take too long thinking about your answer your immediate reaction is best.

|  | Most of the time | A lot of the time | Occasionally | Not at All |
| --- | --- | --- | --- | --- |
| 1. I feel that my organization will always support me | *0* | *1* | *2* | *3* |
| 1. I feel angry at my organization | *3* | *2* | *1* | *0* |
| 1. I feel that what my organization says publicly about values and how it treats its members are different | *3* | *2* | *1* | *0* |
| 1. I feel that my organization values me | *0* | *1* | *2* | *3* |
| 1. I feel let down by the organization I work for | *3* | *2* | *1* | *0* |
| 1. I feel embarrassed by how my organization has treated me | *3* | *2* | *1* | *0* |
| 1. I trust the senior management of my organization to do the right thing | *0* | *1* | *2* | *3* |
| 1. I feel my organization is making an example of me to deter others | *3* | *2* | *1* | *0* |
| 1. I feel I have been blamed unfairly by my organization for problems at work | *3* | *2* | *1* | *0* |
| 1. I find it difficult to think about anything else apart from how my organization has treated me | *3* | *2* | *1* | *0* |
