# Supplementary material for: Workplace Assessment Scale: Pilot Validation Study
Source: Preprints.org preprint supplement (doi:10.20944/preprints202208.0391.v1), 2022-08-23
Supplement: Supplementary file 3 [file supplementary › Table S1. Study outcome measures and timing of administration.docx]

**Table S1. Study outcome measures and timing of administration**

| **Measures** | **Indication** | **Administration** | **Timing** | | | |
| --- | --- | --- | --- | --- | --- | --- |
| **Baseline** | **Week 4** | **Week 8** | **Week 12** |
| Montgomery-Asberg Depression Rating Scale (MADRS) | Depression | Interview | X | - | - | - |
| Clinician-Administered PTSD Scale for DSM-5 (CAPS-5) | PTSD | Interview | X | - | - | - |
| World Health Organization – Alcohol, Smoking and Substance Involvement Screening Test (WHO – ASSIST) | Substance Use | Interview | X | - | - | - |
| Maslach Burnout Inventory – Human Services Survey (MBI-HSS) | Burnout | Self-Report | X | - | - | - |
| Adverse Childhood Experiences Scale (ACE-Q) | Childhood Maltreatment | Self-Report | X | - | - | - |
| Workplace assessment scale (WAS) | Workplace Satisfaction | Self-Report | X | - | - | - |
| Oslo Social Support Scale (OSSS-3) | Social Support | Self-Report | X | - | - | - |
| Patient Health Questionnaire – 9 (PHQ-9) | Depression | Self-Report | X | X | X | X |
| PTSD Checklist for DSM-5  (PCL-5) | PTSD | Self-Report | X | X | X | X |
| Alcohol Use Disorders Identification Test (AUDIT) | Alcohol Use | Self-Report | X | X | X | X |
| Drug Abuse Screening Test (DAST-10) | Substance Use | Self-Report | X | X | X | X |
| World Health Organization Quality of Life (WHOQOL-BREF) | Quality of Life | Self-Report | X | X | X | X |
| Generalized Anxiety Disorder-7 (GAD-7) | Anxiety | Self-Report | X | X | X | X |
| Warwick Edinburgh Mental Wellbeing Scale (WEMWBS) | Wellbeing | Self-Report | X | X | X | X |
| Workplace Productivity and Impairment (WPAI) | Workplace Productivity | Self-Report | X | X | X | X |
| Columbia-Suicide Severity Rating Scale  (C-SSRS) | Suicidality | Self-Report | X | X | X | X |
